# Supplementary material for: Oleocanthal Ameliorates Metabolic and Behavioral Phenotypes in a Mouse Model of Alzheimer’s Disease
Source: MDPI journal article supplement (doi:10.3390/molecules28145592), 2023-07-23
Supplement: s1 [file s1]

## Supplementary data

**Figure S1.** The effect of aging on changes in metabolic parameters in 4- vs. 9-month-old WT mice with time for 24 h. Data are presented as mean  $\pm$  SEM for n = 10 mice/group for each time point.

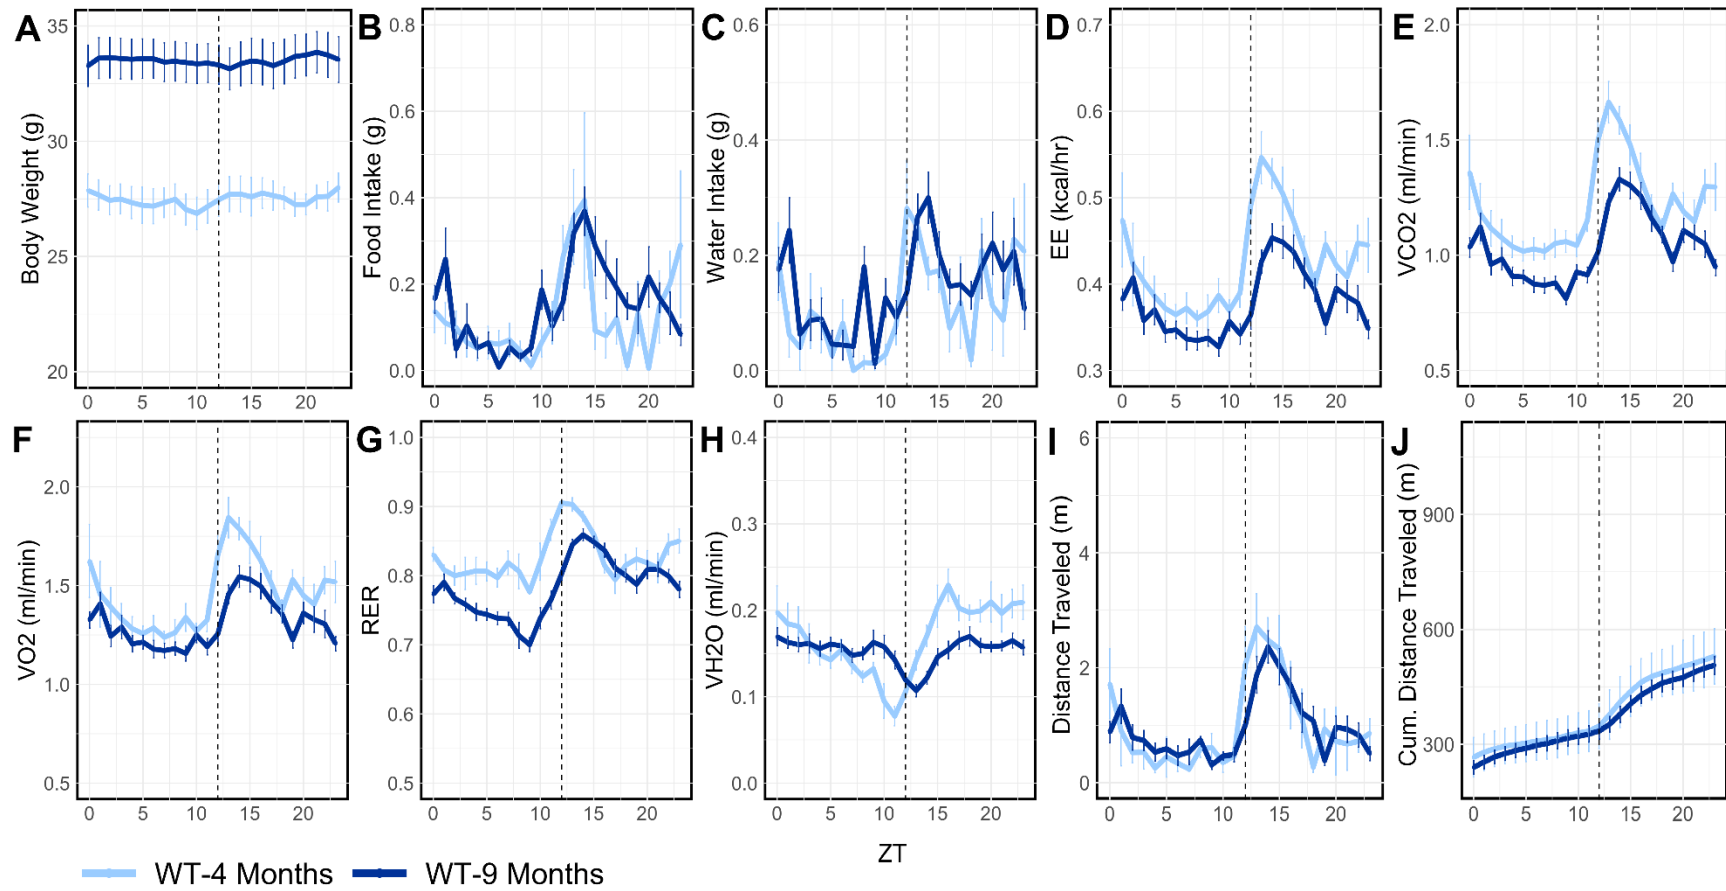

**Table S1. Statistical significance of WT-4 vs. WT-9 months shown in Figure S1.**

| ZT                              | 0 | 1 | 2 | 3 | 4 | 5 | 6 | 7  | 8  | 9 | 10 | 11  | 12  | 13 | 14 | 15 | 16 | 17 | 18 | 19 | 20 | 21 | 22 | 23 |
|---------------------------------|---|---|---|---|---|---|---|----|----|---|----|-----|-----|----|----|----|----|----|----|----|----|----|----|----|
| Body Weight                     | * | * | * | * | * | * | * | *  | *  | * | ** | *   | *   | *  | *  | *  | *  | *  | *  | *  | ** | *  | *  | *  |
| Food Intake                     |   |   |   |   |   |   |   |    |    |   |    |     |     |    |    |    |    |    |    |    |    |    |    |    |
| Water Intake                    |   |   |   |   |   |   |   |    |    |   |    |     |     |    |    |    |    |    |    |    |    |    |    |    |
| EE                              | * |   |   |   |   |   |   |    |    |   |    |     | **  | ** |    |    |    |    |    | *  |    |    |    | *  |
| VCO2                            | * |   |   |   |   |   |   |    |    |   |    |     | *** | ** |    |    |    |    |    | *  |    |    |    | *  |
| VO2                             |   |   |   |   |   |   |   |    |    |   |    |     | **  | ** |    |    |    |    |    | *  |    |    |    | *  |
| RER                             |   |   |   |   |   |   |   | ** | ** | * | ** | *** | *** |    |    |    |    |    |    |    |    |    |    | *  |
| VH2O                            |   |   |   |   |   |   |   |    |    |   | *  | *   |     |    |    | *  | ** |    |    |    |    |    |    |    |
| Traveled distance               |   |   |   |   |   |   |   |    |    |   |    |     |     |    |    |    |    |    |    |    |    |    |    |    |
| Cumulative<br>traveled distance |   |   |   |   |   |   |   |    |    |   |    |     |     |    |    |    |    |    |    |    |    |    |    |    |

p<0.05 =\*, p<0.01=\*\*, p<0.001=\*\*\*

**Figure S2.** The effect of aging on changes in metabolic parameters in 4- vs. 9-month-old 5xFAD mice with time for 24 h. Data are presented as mean + SEM for n = 10 mice/group for each time point.

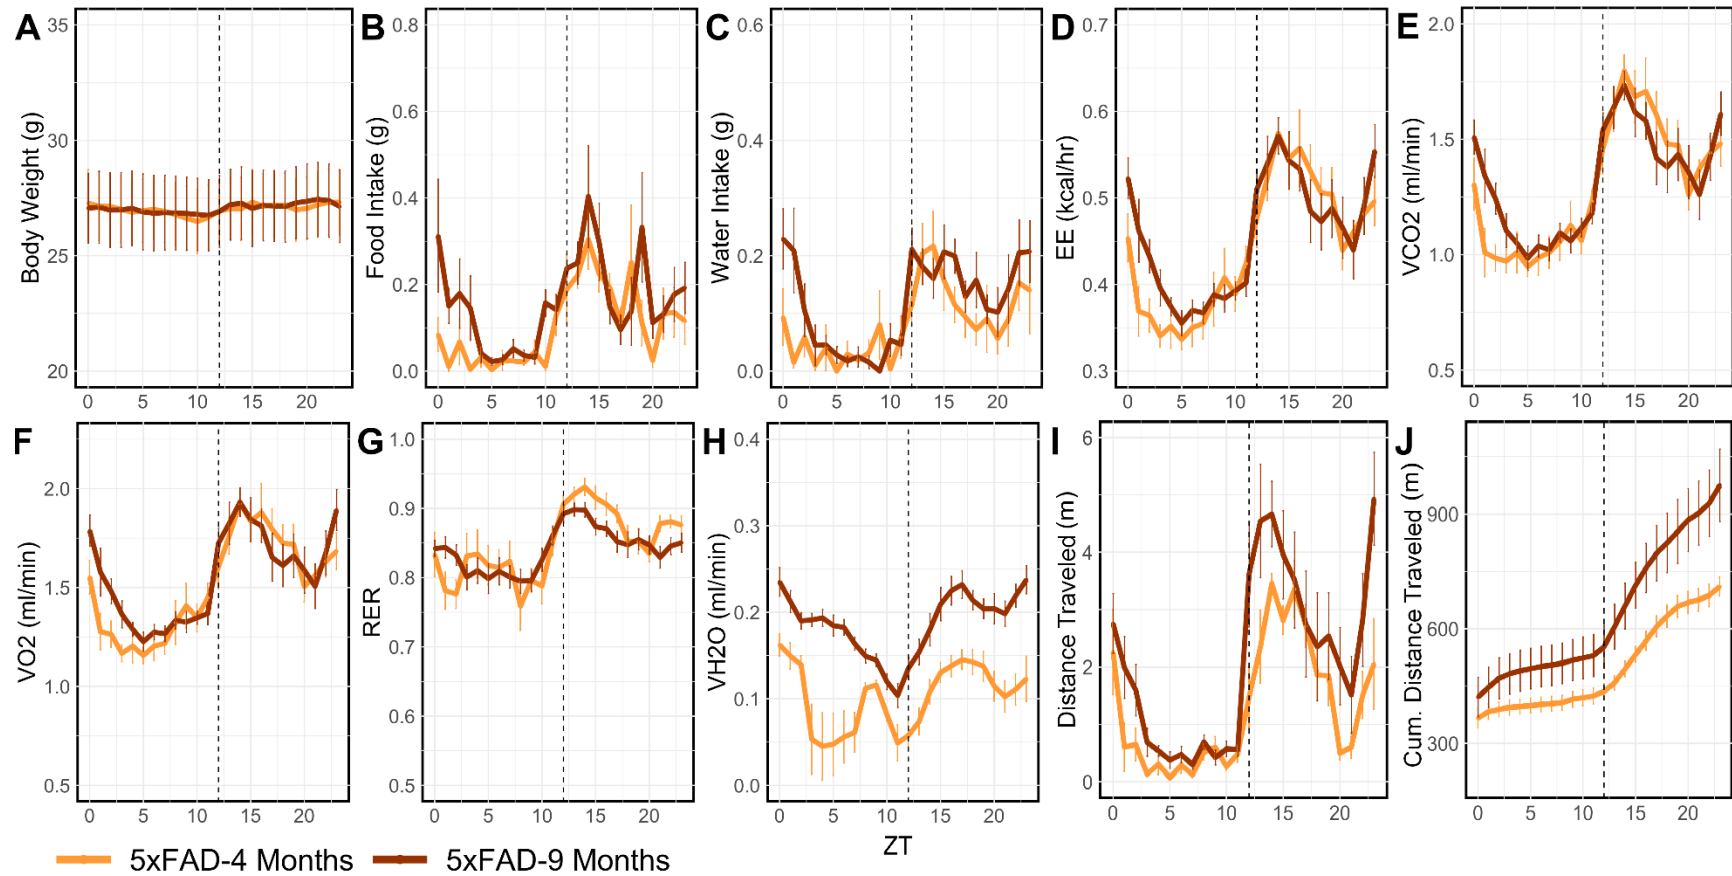

**Table S2. Statistical significance of 5xFAD-4 vs. 5xFAD-9 months shown in Figure S2.**

| ZT                           | 0  | 1 | 2 | 3   | 4   | 5   | 6   | 7   | 8 | 9 | 10 | 11 | 12 | 13 | 14 | 15 | 16 | 17 | 18 | 19 | 20  | 21  | 22  | 23  |
|------------------------------|----|---|---|-----|-----|-----|-----|-----|---|---|----|----|----|----|----|----|----|----|----|----|-----|-----|-----|-----|
| Body Weight                  |    |   |   |     |     |     |     |     |   |   |    |    |    |    |    |    |    |    |    |    |     |     |     |     |
| Food Intake                  |    |   |   |     |     |     |     |     |   |   |    |    |    |    |    |    |    |    |    |    |     |     |     |     |
| Water Intake                 |    | * |   |     |     |     |     |     |   |   |    |    |    |    |    |    |    |    |    |    |     |     |     |     |
| EE                           |    | * |   |     |     |     |     |     |   |   |    |    |    |    |    |    |    |    |    |    |     |     |     |     |
| VCO2                         |    | * |   |     |     |     |     |     |   |   |    |    |    |    |    |    |    |    |    |    |     |     |     |     |
| VO2                          |    |   |   |     |     |     |     |     |   |   |    |    |    |    |    |    |    |    |    |    |     |     |     |     |
| RER                          |    |   |   |     |     |     |     |     |   |   |    |    |    |    |    |    |    |    |    |    |     |     |     |     |
| VH2O                         | ** | * |   | *** | *** | *** | *** | *** |   |   |    |    | ** | ** | ** | ** | ** | ** | ** | *  | *** | *** | *** | *** |
| Traveled distance            |    |   |   |     |     |     |     |     |   |   |    |    | ** | ** |    |    |    |    |    |    |     |     |     | *** |
| Cumulative traveled distance |    |   |   |     |     |     |     |     |   |   |    |    |    |    |    | *  | *  | *  | *  | *  | *   | **  | **  | **  |

p<0.05 =\*, p<0.01=\*\*, p<0.001=\*\*\*

**Figure S3.** The effect of pathology on changes in metabolic parameters in 4-months old WT vs. 5xFAD mice with time for 24 h. Data are presented as mean + SEM for n = 10 mice/group for each time point.

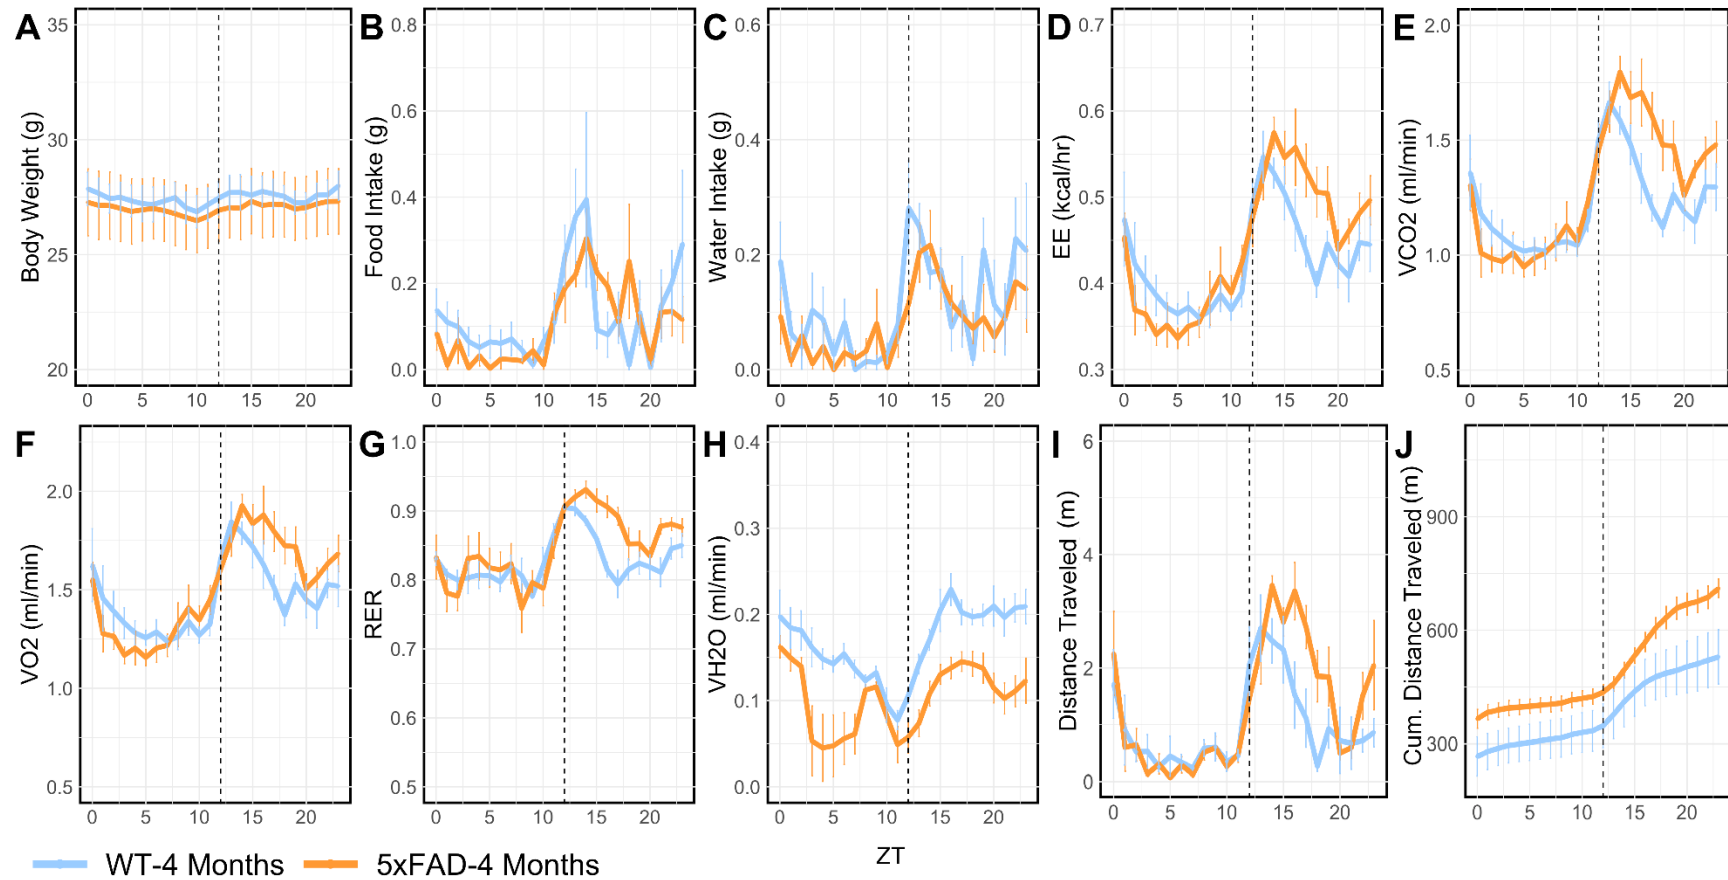

**Table S3. Statistical significance of 4 months WT vs. 5XFAD in Figure S3.**

| ZT                           | 0 | 1 | 2 | 3   | 4   | 5  | 6  | 7 | 8 | 9 | 10 | 11 | 12 | 13 | 14 | 15 | 16 | 17 | 18 | 19 | 20 | 21 | 22 | 23 |
|------------------------------|---|---|---|-----|-----|----|----|---|---|---|----|----|----|----|----|----|----|----|----|----|----|----|----|----|
| Body Weight                  |   |   |   |     |     |    |    |   |   |   |    |    |    |    |    |    |    |    |    |    |    |    |    |    |
| Food Intake                  |   |   |   |     |     |    |    |   |   |   |    |    |    |    |    |    |    |    |    |    |    |    |    |    |
| Water Intake                 |   |   |   |     |     |    |    |   |   |   |    |    |    |    |    |    |    |    |    |    |    |    |    |    |
| EE                           |   |   |   |     |     |    |    |   |   |   |    |    |    |    |    |    |    |    | *  |    |    |    |    |    |
| VCO2                         |   |   |   |     |     |    |    |   |   |   |    |    |    |    |    |    | *  | *  | *  |    |    |    |    |    |
| VO2                          |   |   |   |     |     |    |    |   |   |   |    |    |    |    |    |    |    |    |    |    |    |    |    |    |
| RER                          |   |   |   |     |     |    |    |   |   |   |    |    |    |    |    |    | *  | ** |    |    |    |    |    |    |
| VH2O                         |   |   |   | *** | *** | ** | ** | * |   |   |    |    |    | *  |    | *  | ** |    |    |    | ** | ** | ** | ** |
| Traveled distance            |   |   |   |     |     |    |    |   |   |   |    |    |    |    |    |    |    |    |    |    |    |    |    |    |
| Cumulative traveled distance |   |   |   |     |     |    |    |   |   |   |    |    |    |    |    |    |    |    |    |    |    |    |    |    |

p<0.05 =\*, p<0.01=\*\*, p<0.001=\*\*\*

**Figure S4.** The effect of pathology on changes in metabolic parameters in 9-months old WT vs. 5xFAD mice with time for 24 h. Data are presented as mean  $\pm$  SEM for n = 10 mice/group for each time point.

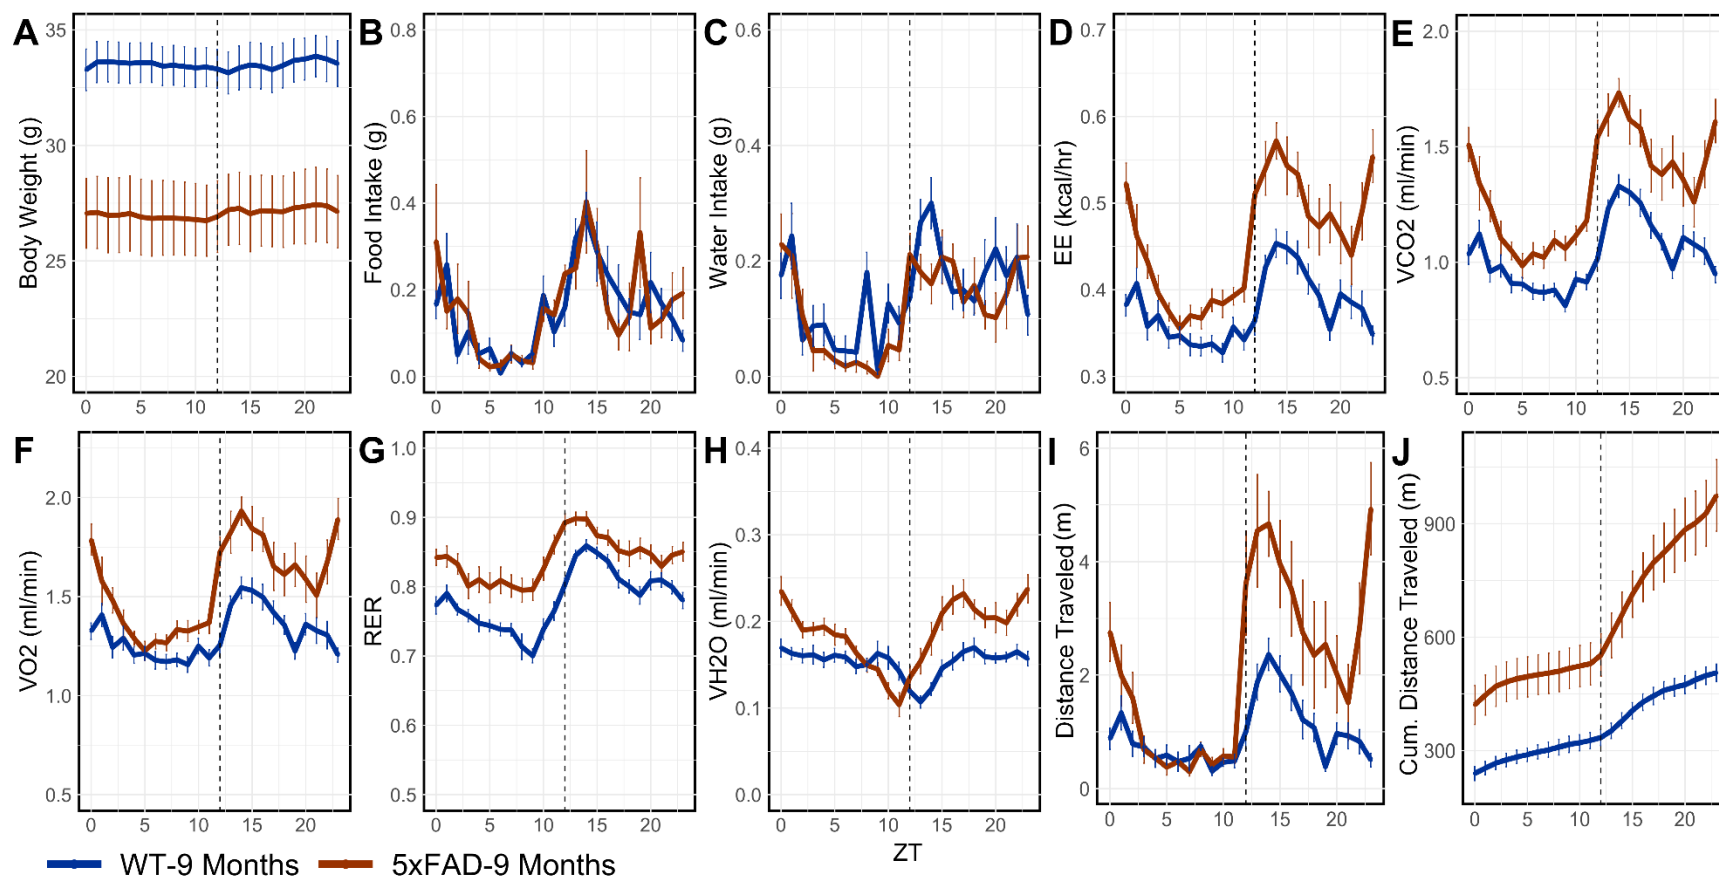

**Table S4. Statistical significance of 9 months WT vs. 5xFAD in Figure S4.**

| <b>ZT</b>                    | <b>0</b> | <b>1</b> | <b>2</b> | <b>3</b> | <b>4</b> | <b>5</b> | <b>6</b> | <b>7</b> | <b>8</b> | <b>9</b> | <b>10</b> | <b>11</b> | <b>12</b> | <b>13</b> | <b>14</b> | <b>15</b> | <b>16</b> | <b>17</b> | <b>18</b> | <b>19</b> | <b>20</b> | <b>21</b> | <b>22</b> | <b>23</b> |
|------------------------------|----------|----------|----------|----------|----------|----------|----------|----------|----------|----------|-----------|-----------|-----------|-----------|-----------|-----------|-----------|-----------|-----------|-----------|-----------|-----------|-----------|-----------|
| Body Weight                  | **       | **       | ***      | ***      | **       | ***      | ***      | **       | ***      | **       | **        | ***       | **        | **        | **        | **        | **        | **        | **        | **        | **        | ***       | **        | **        |
| Food Intake                  |          |          |          |          |          |          |          |          |          |          |           |           |           |           |           |           |           |           |           |           |           |           |           |           |
| Water Intake                 |          |          |          |          |          |          |          |          | *        |          |           |           |           |           |           |           |           |           |           |           |           |           |           |           |
| EE                           | ***      |          | *        |          |          |          |          |          |          |          |           |           | ***       | ***       | ***       | **        | *         |           | *         | ***       |           |           | **        | ***       |
| VCO2                         | ***      |          | *        |          |          |          |          |          |          | *        |           | *         | ***       | ***       | ***       | **        | **        | *         | **        | ***       | *         |           | ***       | ***       |
| VO2                          | ***      |          |          |          |          |          |          |          |          |          |           |           | ***       | **        | ***       | **        | **        |           | *         | ***       |           |           | **        | ***       |
| RER                          | **       | *        | **       |          | *        | *        | **       | *        | ***      | ***      | ***       | ***       | ***       | *         |           |           |           |           |           | **        |           |           |           | **        |
| VH2O                         | **       | *        |          |          |          |          |          |          |          |          |           |           |           | *         | **        | **        | ***       | **        |           |           | *         |           | *         | ***       |
| Traveled distance            | **       |          |          |          |          |          |          |          |          |          |           |           | ***       | ***       | ***       | **        | **        | *         |           | ***       |           |           | **        | ***       |
| Cumulative traveled distance | **       | **       | **       | **       | **       | **       | **       | **       | **       | **       | **        | **        | **        | ***       | ***       | ***       | ***       | ***       | ***       | ***       | ***       | ***       | ***       | ***       |

p<0.05 =\*, p<0.01=\*\*, p<0.001=\*\*\*
